# Supplementary material for: Environmental Factors Variably Impact Tea Secondary Metabolites in the Context of Climate Change
Source: PubMed Central journal article supplement (PMC6702324; doi:10.3389/fpls.2019.00939), 2019-08-13
Supplement: Image_1.pdf [file Image_1.pdf]

## Supplementary Material

### 1 Supplementary Figure

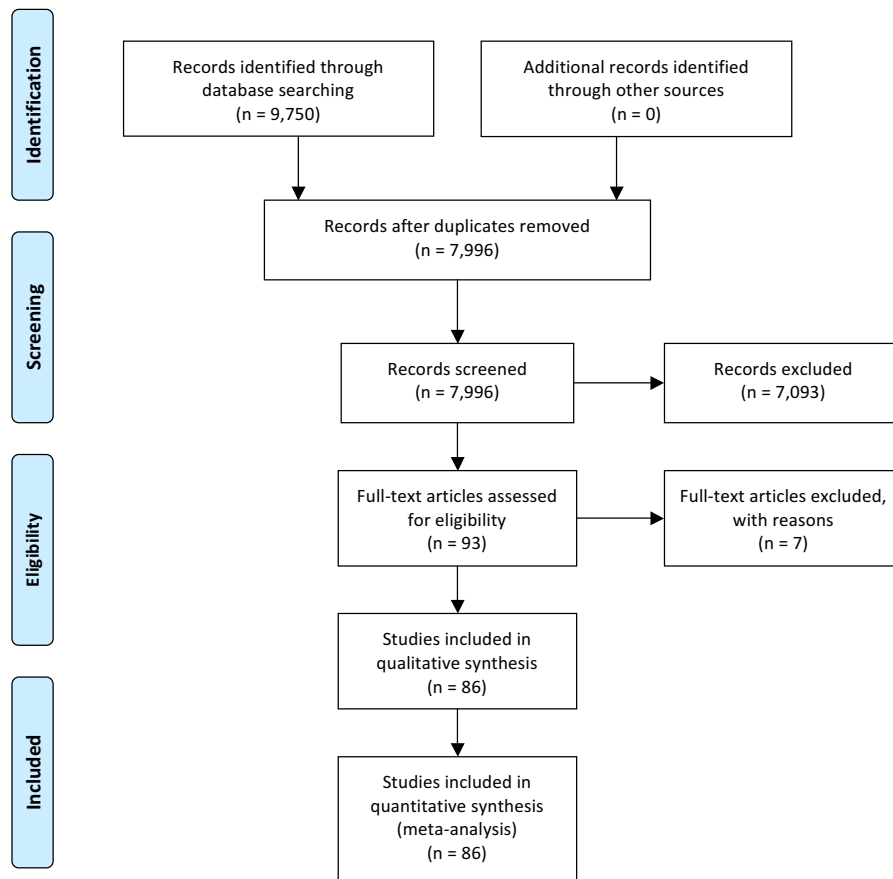

**Supplementary Figure 1. PRISMA flow diagram.** PRISMA flow diagram depicting the number of articles identified, screened, assessed for eligibility, and included in the systematic review synthesis.
